# Supplementary material for: Tripeptide-Assisted Gold Nanocluster Formation for Fe3+ and Cu2+ Sensing
Source: MDPI journal article supplement (doi:10.3390/molecules29112416), 2024-05-21
Supplement: s1 [file s1]

## Supplementary Materials

# Tripeptide-Assisted Gold Nanocluster Formation for Fe<sup>3+</sup> and Cu<sup>2+</sup> Sensing

Jonghae Youn <sup>1,2</sup>, Peiyuan Kang <sup>2</sup>, Justin Crowe <sup>3</sup>, Caleb Thornsberry <sup>3</sup>, Peter Kim <sup>1</sup>, Zhenpeng Qin <sup>2,4,5,6</sup> and Jiyong Lee <sup>3,\*</sup>

<sup>1</sup> Department of Chemistry and Biochemistry, The University of Texas at Dallas, Richardson, TX 75080, USA

<sup>2</sup> Department of Mechanical Engineering, The University of Texas at Dallas, Richardson, TX 75080, USA

<sup>3</sup> Department of Chemistry and Biochemistry, The University of Texas at Tyler, Tyler, TX 75799, USA

<sup>4</sup> Department of Bioengineering, The University of Texas at Dallas, Richardson, TX 75080, USA

<sup>5</sup> Department of Surgery, The University of Texas Southwestern Medical Center, Dallas, TX 75390, USA

<sup>6</sup> Center for Advanced Pain Studies, The University of Texas at Dallas, Richardson, TX 75080, USA

\* Correspondence: jiyonglee@uttyler.edu

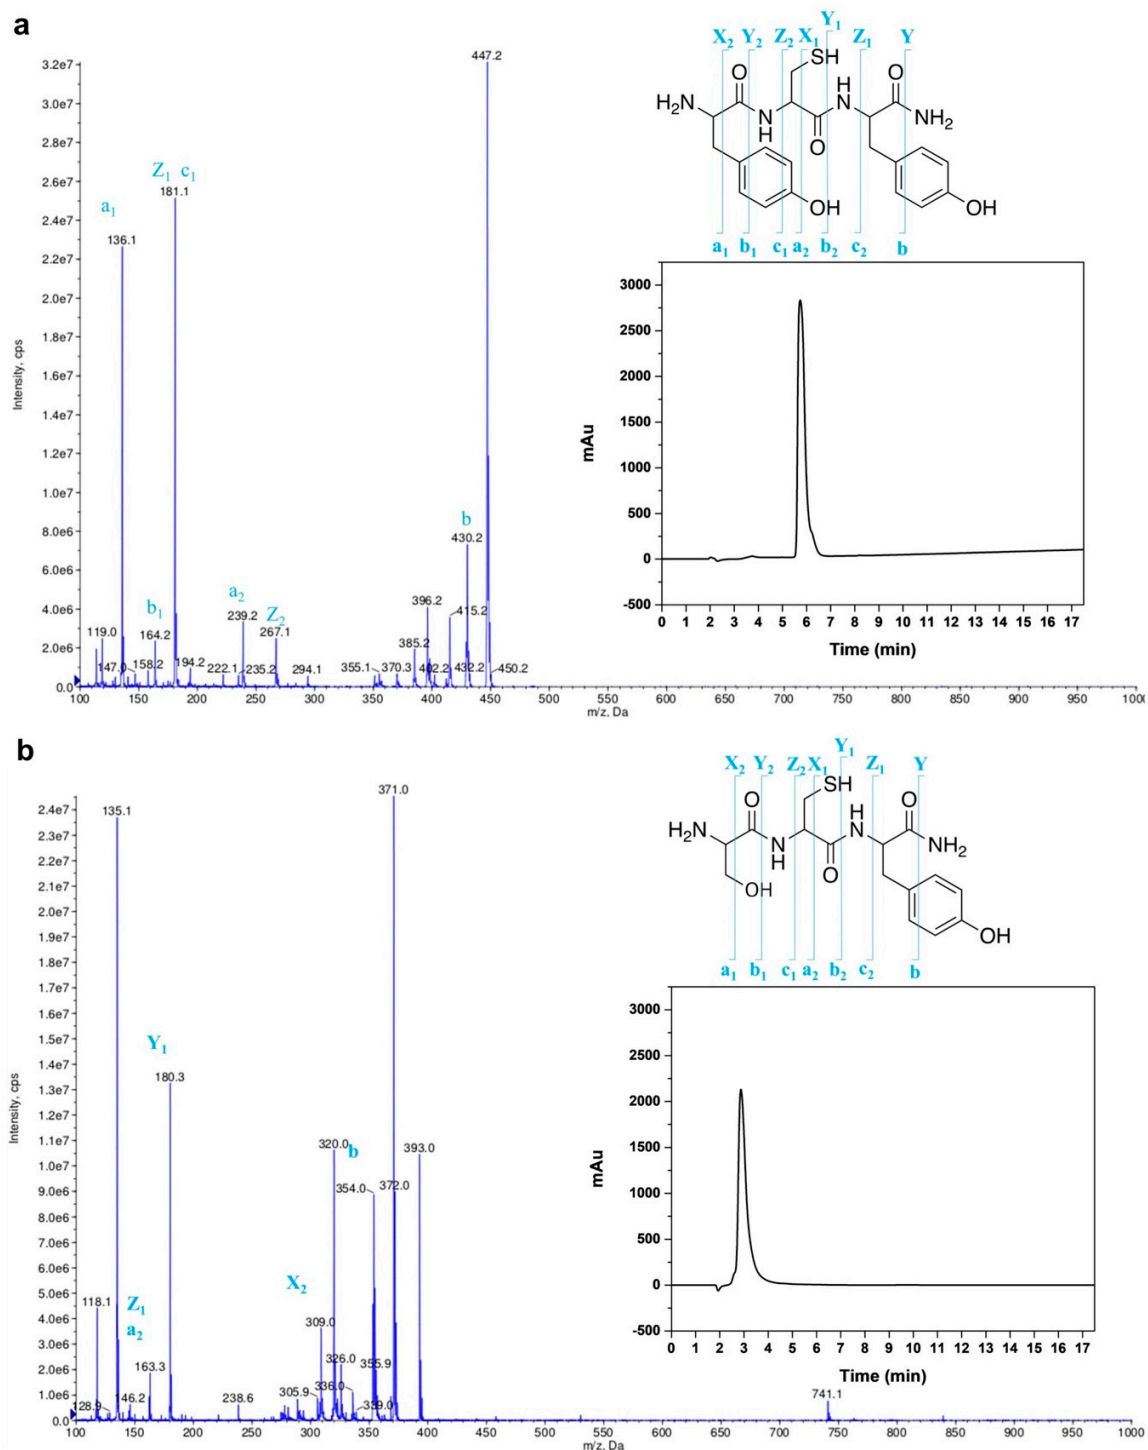

**Figure S1.** HPLC-MS/MS of (a) YCY and (b) SCY. Insets show analytical HPLC chromatogram of each peptide. LC gradient for YCY: 0% to 30% acetonitrile over 20 min, LC gradient for SCY: 0% acetonitrile over 20 min.

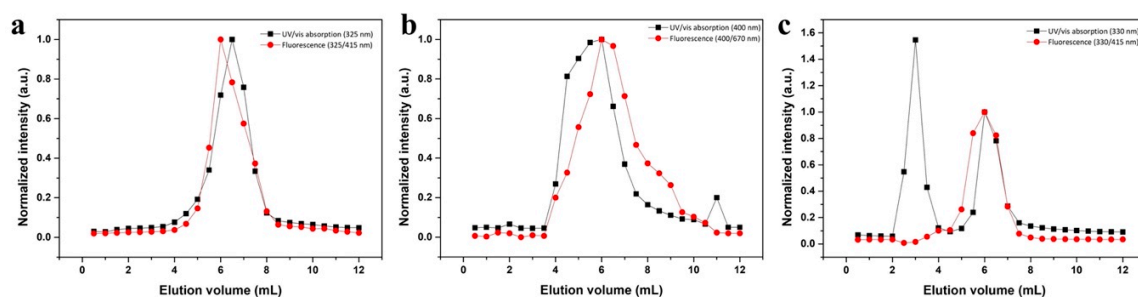

**Figure S2.** UV-Vis absorption and fluorescence intensity of the fractions from the size exclusion chromatography (Sephadex<sup>TM</sup> G-25): (a) Red-YCY-AuNC, (b) Blue-YCY-AuNC, and (c) Blue-SCY-AuNC.

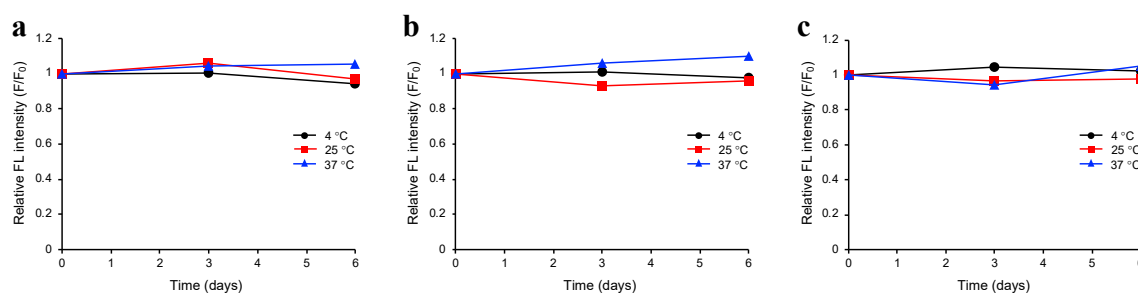

**Figure S3.** Fluorescence intensity of the AuNC solutions over time at 4 °C, 25 °C and 37 °C: (a) Blue-SCY-AuNC ( $\lambda_{\text{ex}}$ : 325 nm,  $\lambda_{\text{em}}$ : 415 nm), (b) Blue-YCY-AuNC ( $\lambda_{\text{ex}}$ : 325 nm,  $\lambda_{\text{em}}$ : 415 nm), and (c) Red-YCY-AuNC ( $\lambda_{\text{ex}}$ : 400 nm,  $\lambda_{\text{em}}$ : 675 nm).

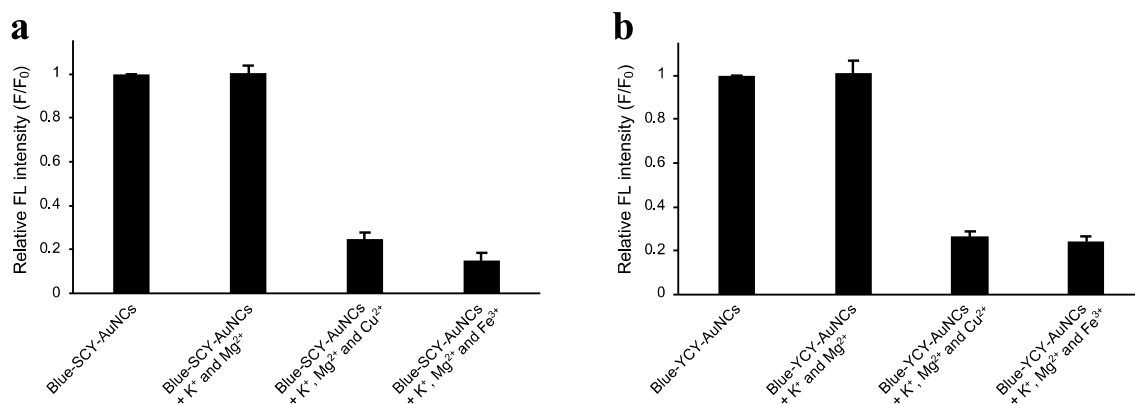

**Figure S4.** Fluorescence quenching of Blue-SCY-AuNC (a) and Blue-YCY-AuNC (b) by Cu<sup>2+</sup> (50  $\mu$ M) and Fe<sup>3+</sup> (50  $\mu$ M) in the presence of K<sup>+</sup> (50  $\mu$ M) and Mg<sup>2+</sup> (50  $\mu$ M). Fluorescent emission at 415 nm was measured with 325 nm excitation.

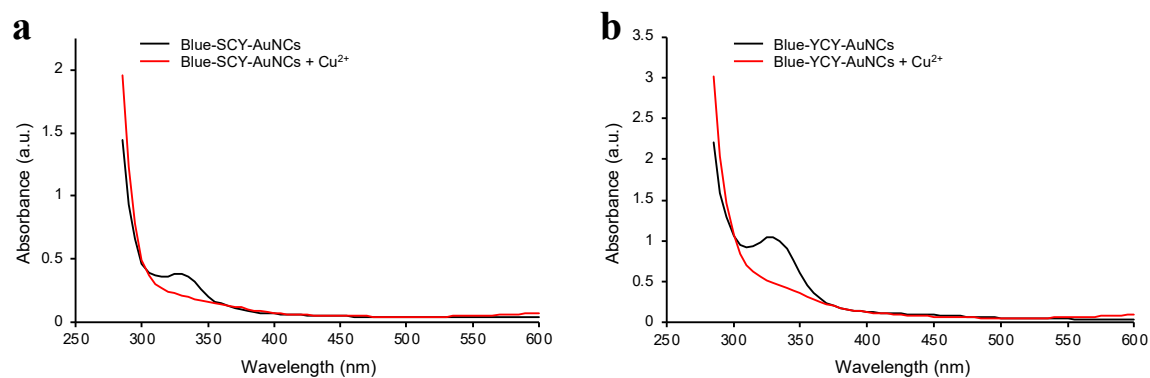

**Figure S5.** UV-Vis absorption spectra of Blue-SCY-AuNC (a) and Blue-YCY-AuNC (b) in the presence or absence of Cu<sup>2+</sup> ions (50  $\mu$ M). The effect Fe<sup>3+</sup> ions on UV-Vis spectrum was not examined due to the spectral overlap of Fe<sup>3+</sup> ions and the AuNCs.
